# Supplementary material for: Investigating the association of health system characteristics and health care utilization: a multilevel model in China’s ageing population
Source: PubMed Central journal article supplement (PMC7719298; doi:10.7189/jogh.10.020802), 2020-12
Supplement: jogh-10-020802-s001.pdf [file jogh-10-020802-s001.pdf]

## Online Supplementary Documents

**Table S1** Health system characteristics of 28 provinces in China in 2015

| Provinces      | <i>Sample size</i> | Per capita GDP,<br>CNY (US\$) | OOP/THE | Outpatient<br>expenditure per visits,<br>CNY (US\$) | Inpatient expenditure per<br>admission, CNY (US\$) | Ward Beds per<br>1000 inhabitants | Health professionals<br>per 1000<br>inhabitants |
|----------------|--------------------|-------------------------------|---------|-----------------------------------------------------|----------------------------------------------------|-----------------------------------|-------------------------------------------------|
| Beijing        | 47                 | 106497 (17099)                | 17.39   | 440.90 (70.79)                                      | 20149.20 (3235.05)                                 | 5.14                              | 10.4                                            |
| Tianjin        | 109                | 107960 (17334)                | 30.98   | 290.90 (46.71)                                      | 15250.20 (2448.49)                                 | 4.12                              | 5.9                                             |
| Hebei          | 746                | 40255 (6463)                  | 36.89   | 210.20 (33.75)                                      | 7517.00 (1206.89)                                  | 4.61                              | 5.0                                             |
| Shanxi         | 522                | 34919 (5606)                  | 33.09   | 230.30 (36.98)                                      | 8045.50 (1291.74)                                  | 5.00                              | 5.8                                             |
| Inner Mongolia | 807                | 71101 (11416)                 | 36.45   | 218.00 (35.00)                                      | 8146.50 (1307.96)                                  | 5.33                              | 6.5                                             |
| Liaoning       | 543                | 65354 (10493)                 | 36.01   | 259.40 (41.65)                                      | 8604.90 (1381.56)                                  | 6.09                              | 6.0                                             |
| Jilin          | 386                | 51086 (8202)                  | 36.73   | 240.30 (38.58)                                      | 8406.90 (1349.77)                                  | 5.25                              | 5.8                                             |
| Heilongjiang   | 310                | 39462 (6336)                  | 35.98   | 241.20 (38.73)                                      | 8285.70 (1330.31)                                  | 5.58                              | 5.6                                             |
| Shanghai       | 71                 | 103796 (16665)                | 21.75   | 316.00 (50.74)                                      | 16084.60 (2582.46)                                 | 5.08                              | 7.0                                             |
| Jiangsu        | 855                | 87995 (14128)                 | 27.02   | 235.50 (37.81)                                      | 10060.30 (1615.23)                                 | 5.19                              | 6.1                                             |
| Zhejiang       | 749                | 77644 (12466)                 | 29.49   | 225.50 (36.21)                                      | 10578.00 (1698.35)                                 | 4.92                              | 7.3                                             |
| Anhui          | 893                | 35997 (5779)                  | 29.82   | 203.20 (32.62)                                      | 6809.20 (1093.25)                                  | 4.35                              | 4.6                                             |
| Fujian         | 495                | 67966 (10912)                 | 26.11   | 209.10 (33.57)                                      | 8173.50 (1312.30)                                  | 4.51                              | 5.5                                             |
| Jiangxi        | 846                | 36724 (5896)                  | 27.54   | 213.00 (34.20)                                      | 6956.00 (1116.82)                                  | 4.33                              | 4.6                                             |
| Shandong       | 1569               | 64168 (10302)                 | 31.95   | 229.40 (36.83)                                      | 8589.70 (1379.12)                                  | 5.27                              | 6.3                                             |
| Henan          | 1330               | 39123 (6281)                  | 35.16   | 164.40 (26.40)                                      | 6874.40 (1103.72)                                  | 5.16                              | 5.5                                             |
| Hubei          | 519                | 50654 (8133)                  | 33.52   | 214.30 (34.41)                                      | 7823.00 (1256.02)                                  | 5.86                              | 6.3                                             |
| Hunan          | 804                | 42754 (6864)                  | 33.72   | 253.60 (40.72)                                      | 6980.10 (1120.69)                                  | 5.85                              | 5.5                                             |
| Guangdong      | 896                | 67503 (10838)                 | 26.04   | 216.40 (34.74)                                      | 9982.20 (1602.69)                                  | 4.02                              | 5.7                                             |
| Guangxi        | 519                | 35190 (5650)                  | 26.64   | 173.20 (27.81)                                      | 7154.60 (1148.71)                                  | 4.47                              | 5.7                                             |

|             |       |                |       |                |                    |      |      |
|-------------|-------|----------------|-------|----------------|--------------------|------|------|
| Chongqing   | 244   | 52321 (8400)   | 28.27 | 266.10 (42.72) | 7481.80 (1201.24)  | 5.85 | 5.5  |
| Sichuan     | 1542  | 36775 (5904)   | 29.67 | 219.20 (35.19) | 7091.20 (1138.53)  | 5.96 | 5.8  |
| Guizhou     | 174   | 29847 (4792)   | 23.39 | 228.90 (36.75) | 5387.70 (865.02)   | 5.57 | 5.3  |
| Yunnan      | 1061  | 28806 (4625)   | 30.24 | 179.70 (28.85) | 5849.50 (939.17)   | 5.01 | 4.8  |
| Shannxi     | 611   | 47626 (7647)   | 32.80 | 211.50 (33.96) | 6604.30 (1060.35)  | 5.59 | 7.0  |
| Gansu       | 475   | 26165 (4201)   | 29.87 | 169.70 (27.25) | 5447.10 (874.56)   | 4.91 | 5.0  |
| Qinghai     | 152   | 41252 (6623)   | 23.90 | 181.10 (29.08) | 7980.20 (1281.26)  | 5.87 | 6.0  |
| Xinjiang    | 95    | 40036 (6428)   | 24.94 | 208.40 (33.46) | 6318.80 (1014.51)  | 6.37 | 6.9  |
| Total       | 17370 | 49992 (8026)   | 29.27 | 233.90 (37.55) | 8268.10 (1327.48)  | 5.11 | 5.8  |
| Maximum     | 1569  | 107960 (17334) | 36.89 | 440.90 (70.79) | 20149.20 (3235.05) | 6.37 | 10.4 |
| Minimum     | 47    | 26165 (4201)   | 17.39 | 164.40 (26.40) | 5387.70 (865.02)   | 4.02 | 4.6  |
| Range ratio | 33.38 | 4.13           | 2.12  | 2.68           | 3.74               | 1.58 | 2.26 |

*Note:* CNY – Chinese Yuan; OOP – out-of-pocket; THE – total health expenditure. Range ratio is the ratio of maximum to the minimum.

Source: China Statistical Yearbook of Health and Family Planning (2016).

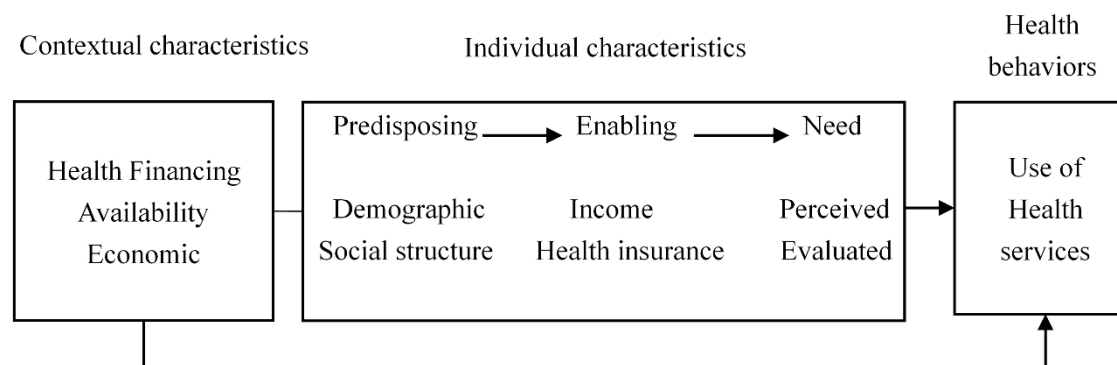

**Figure S1** Analysis framework of health care utilization including health system and individual characteristics
